# Supplementary material
Source: Springer Nature journal article supplement (http://www.springermedizin.de/resource/supplementary/12984_2009_191_MOESM1_ESM.pdf/9605500)

**A**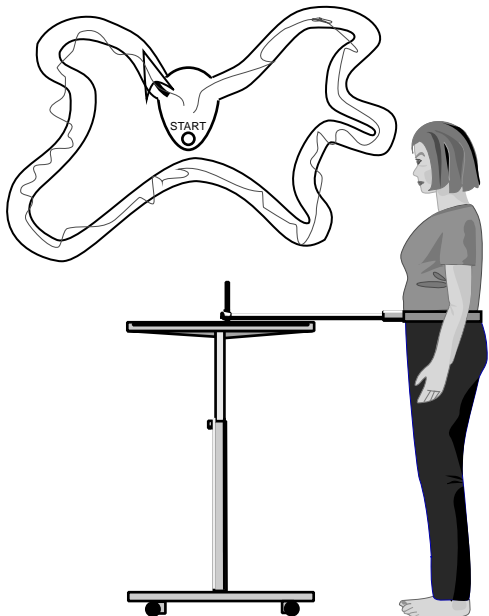**B**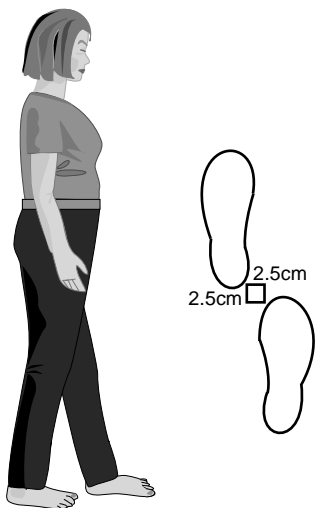

Supplement: MOESM1 [file 9605500]
